# Supplementary material for: Codon Adaptation of Plastid Genes
Source: PLoS One. 2016 May 19;11(5):e0154306. doi: 10.1371/journal.pone.0154306 (PMC4873144; doi:10.1371/journal.pone.0154306)
Supplement: S4 Table — Presence (1) or absence (0) of a complementary tRNA is indicated. Some genomes contain multiple tRNA genes with the same anticodon sequence but these are not enumerated. (XLSX) [file pone.0154306.s004.xlsx]

## Sheet: SI_Table_4
	ANITCODON:	AAA	GAA	TAA	CAA	AGA	GGA	TGA	CGA	ATA	GTA	TTA	CTA	ACA	GCA	TCA	CCA	AAG	GAG	TAG	CAG	AGG	GGG	TGG	CGG	ATG	GTG	TTG	CTG	ACG	GCG	TCG	CCG	AAT	GAT	TAT	CAT	AGT	GGT	TGT	CGT	ATT	GTT	TTT	CTT	ACT	GCT	TCT	CCT
	CODON:	TTT	TTC	TTA	TTG	TCT	TCC	TCA	TCG	TAT	TAC	TAA	TAG	TGT	TGC	TGA	TGG	CTT	CTC	CTA	CTG	CCT	CCC	CCA	CCG	CAT	CAC	CAA	CAG	CGT	CGC	CGA	CGG	ATT	ATC	ATA	ATG	ACT	ACC	ACA	ACG	AAT	AAC	AAA	AAG	AGT	AGC	AGA	AGG
ACCESSION	DEFINITION
NC_000925	Porphyra purpurea	0	1	1	1	0	1	1	1	0	1	0	0	0	0	0	1	0	1	1	0	0	0	1	0	0	1	1	0	1	0	0	1	0	1	0	1	0	1	1	0	0	1	1	0	0	1	1	1
NC_000926	Guillardia theta	0	1	1	1	0	0	1	0	0	1	0	0	0	1	0	1	0	0	1	0	0	0	1	0	0	1	1	0	1	0	0	1	0	1	0	1	0	0	1	0	0	1	1	0	0	1	1	0
NC_000927	Nephroselmis olivacea	0	1	1	1	0	1	1	1	0	1	0	0	0	1	0	1	0	1	1	0	0	0	1	0	0	1	1	0	1	0	0	1	0	1	0	1	0	1	1	0	0	1	1	0	0	1	1	0
NC_001319	Marchantia polymorpha	0	1	1	1	0	1	1	0	0	1	0	0	0	1	0	1	0	0	1	0	0	0	1	0	0	1	1	0	1	0	0	1	0	0	0	1	0	1	1	0	0	1	1	0	0	1	1	0
NC_001320	Oryza sativa	0	1	0	1	0	1	1	0	0	1	0	0	0	1	0	1	0	0	1	0	0	0	1	0	0	1	1	0	1	0	0	0	0	1	0	1	0	1	1	0	0	1	1	0	0	1	1	0
NC_001603	Euglena gracilis	0	1	1	1	0	0	1	0	0	1	0	0	0	1	0	1	0	0	1	0	0	0	1	0	0	1	1	0	1	0	0	0	0	1	0	1	0	0	1	0	0	1	1	0	0	1	1	0
NC_001631	Pinus thunbergii	0	1	1	1	0	1	1	0	0	1	0	0	0	1	0	1	0	0	1	0	0	1	1	0	0	1	1	0	1	0	0	1	0	1	0	1	0	1	1	0	0	1	1	0	0	1	1	0
NC_001675	Cyanophora paradoxa	0	1	1	1	0	1	1	1	0	1	0	0	0	1	0	1	0	1	1	0	0	0	1	0	0	1	1	0	1	0	0	1	0	1	0	1	0	1	1	0	0	1	1	0	0	1	1	0
NC_001713	Odontella sinensis	0	1	1	0	0	0	1	0	0	1	0	0	0	1	0	1	0	0	1	0	0	0	1	0	0	1	1	0	1	0	0	1	0	1	0	1	0	0	1	0	0	1	1	0	0	1	1	0
NC_001840	Cyanidium caldarium	0	1	1	1	0	0	1	0	0	1	0	0	0	1	0	1	0	1	1	0	0	0	1	0	0	1	1	0	1	0	0	1	0	1	0	1	0	1	1	0	0	1	1	0	0	1	1	0
NC_001865	Chlorella vulgaris	0	1	1	1	0	1	1	0	0	1	0	0	0	1	0	1	0	1	1	0	0	0	1	0	0	1	1	0	1	0	0	1	0	1	0	1	0	1	1	0	0	1	1	0	0	1	1	0
NC_001879	Nicotiana tabacum	0	1	1	1	0	1	1	0	0	1	0	0	0	1	0	1	0	0	1	0	0	0	1	0	0	1	1	0	1	0	0	0	0	1	0	1	0	1	1	0	0	1	1	0	0	1	1	0
NC_002186	Mesostigma viride	0	1	1	1	0	1	1	1	0	1	0	0	0	1	0	1	0	1	1	0	0	0	1	0	0	1	1	0	1	0	0	0	0	1	0	1	0	1	1	0	0	1	1	0	0	1	1	0
NC_002652	Euglena longa	0	1	1	1	0	0	1	0	0	1	0	0	0	1	0	1	0	0	1	0	0	0	1	0	0	1	1	0	1	0	0	0	0	1	0	1	0	0	1	0	0	1	1	0	0	1	1	0
NC_004115	Chaetosphaeridium globosum	0	1	1	1	0	1	1	0	0	1	0	0	0	1	0	1	0	0	1	0	0	1	1	0	0	1	1	0	1	0	0	1	0	1	0	1	0	1	1	0	0	1	0	0	0	1	1	0
NC_004677	Pinus koraiensis	0	1	1	1	0	1	1	0	0	1	0	0	0	1	0	1	0	0	1	0	0	1	1	0	0	1	1	0	1	0	0	1	0	1	0	1	0	1	1	0	0	1	1	0	0	1	1	0
NC_004799	Cyanidioschyzon merolae	0	1	1	1	0	1	1	0	0	1	0	0	0	1	0	1	0	1	1	0	0	0	1	0	0	1	1	0	1	0	0	0	0	1	0	1	0	1	1	0	0	1	1	0	0	1	1	0
NC_005353	Chlamydomonas reinhardtii	0	1	1	0	0	0	1	0	0	1	0	0	0	0	0	1	0	0	1	0	0	0	1	0	0	1	1	0	1	0	0	0	0	1	0	1	0	0	1	0	0	1	1	0	0	1	1	0
NC_005973	Oryza nivara	0	1	1	1	0	1	1	0	0	1	0	0	0	1	0	1	0	0	1	0	0	0	1	0	0	1	1	0	1	0	0	0	0	1	0	1	0	1	1	0	0	1	1	0	0	1	1	0
NC_006137	Gracilaria tenuistipitata	0	1	1	1	0	0	1	0	0	1	0	0	0	1	0	1	0	0	1	0	0	0	1	0	0	1	1	0	1	0	0	1	0	1	0	1	0	1	1	0	0	1	1	0	0	1	1	0
NC_007288	Emiliania huxleyi	0	1	1	0	0	0	1	0	0	1	0	0	0	1	0	1	0	0	1	0	0	0	1	0	0	1	1	0	1	0	0	1	0	1	0	1	0	0	1	0	0	1	1	0	0	1	1	0
NC_007500	Nicotiana sylvestris	0	1	1	1	0	1	1	0	0	1	0	0	0	1	0	1	0	0	1	0	0	0	1	0	0	1	1	0	1	0	0	0	0	1	0	1	0	1	1	0	0	1	1	0	0	1	1	0
NC_007602	Nicotiana tomentosiformis	0	1	1	1	0	1	1	0	0	1	0	0	0	1	0	1	0	0	1	0	0	0	1	0	0	1	1	0	1	0	0	0	0	1	0	1	0	1	1	0	0	1	1	0	0	1	1	0
NC_007932	Porphyra yezoensis	0	1	1	1	0	1	1	1	0	1	0	0	0	1	0	1	0	1	1	0	0	0	1	0	0	1	1	0	1	0	0	1	0	1	0	1	0	1	1	0	0	1	1	0	0	1	1	1
NC_008097	Chara vulgaris	0	1	1	1	0	1	1	0	0	1	0	0	0	1	0	1	0	1	1	0	0	0	1	0	0	1	1	0	1	0	0	1	0	1	0	1	0	1	1	0	0	1	1	0	0	1	1	0
NC_008099	Oltmannsiellopsis viridis	0	1	1	0	0	0	1	0	0	1	0	0	0	1	0	1	0	0	1	0	0	0	1	0	0	1	1	0	1	0	0	0	0	1	0	1	0	0	1	0	0	1	1	0	0	1	1	1
NC_008101	Acutodesmus obliquus	0	1	1	0	0	0	1	0	0	1	0	0	0	1	0	1	0	0	1	0	0	0	1	0	0	1	1	0	1	0	0	0	0	1	0	1	0	0	1	0	0	1	1	0	0	1	1	0
NC_008114	Pseudendoclonium akinetum	0	1	1	1	0	0	1	0	0	1	0	0	0	1	0	1	0	0	1	0	0	0	1	0	0	1	1	0	1	0	0	1	0	1	0	1	0	0	1	0	0	1	1	0	0	1	1	1
NC_008116	Staurastrum punctulatum	0	1	1	1	0	1	1	0	0	1	0	0	0	1	0	1	0	0	1	0	0	0	1	0	0	1	1	0	1	0	0	1	0	1	0	1	0	1	1	0	0	1	1	0	0	1	1	0
NC_008117	Zygnema circumcarinatum	0	1	1	1	0	1	1	1	0	1	0	0	0	1	0	1	0	0	1	0	0	1	1	0	0	1	1	0	1	0	0	1	0	1	0	1	0	1	1	0	0	1	1	0	0	1	1	0
NC_008155	Oryza sativa Indica	0	1	1	1	0	1	1	0	0	1	0	0	0	1	0	1	0	0	1	0	0	0	1	0	0	1	1	0	1	0	0	0	0	0	0	1	0	1	1	0	0	1	1	0	0	1	1	0
NC_008289	Ostreococcus tauri	0	1	1	0	0	0	1	0	0	1	0	0	0	1	0	1	0	1	1	0	0	0	1	0	0	1	1	0	1	0	0	0	0	1	0	1	0	0	1	0	0	1	1	0	0	1	1	0
NC_008372	Stigeoclonium helveticum	0	1	1	1	0	1	1	0	0	1	0	0	0	1	0	1	0	0	1	0	0	0	1	0	0	1	1	0	1	0	0	0	0	1	0	1	0	0	1	0	0	1	1	0	0	1	1	0
NC_008588	Phaeodactylum tricornutum	0	1	1	0	0	0	1	0	0	1	0	0	0	1	0	1	0	0	1	0	0	0	1	0	0	1	1	0	1	0	0	1	0	1	0	1	0	0	1	0	0	1	1	0	0	1	1	0
NC_008589	Thalassiosira pseudonana	0	1	1	0	0	0	1	0	0	1	0	0	0	1	0	1	0	0	1	0	0	0	1	0	0	1	1	0	1	0	0	1	0	1	0	1	0	0	1	0	0	1	1	0	0	1	1	0
NC_008822	Chlorokybus atmophyticu	0	1	1	1	0	1	1	1	0	1	0	0	0	1	0	1	0	1	1	0	0	0	1	0	0	1	1	0	1	0	0	1	0	1	0	1	0	1	1	0	0	1	1	0	0	1	1	0
NC_009573	Rhodomonas salina	0	1	1	1	0	1	1	0	0	1	0	0	0	1	0	1	0	0	1	0	0	0	1	0	0	1	1	0	1	0	0	1	0	1	0	1	0	0	1	0	0	1	1	0	0	1	1	0
NC_009681	Leptosira terrestris	0	1	1	1	0	0	1	0	0	1	0	0	0	1	0	1	0	0	1	0	0	0	1	0	0	1	1	0	1	0	0	1	0	1	0	1	0	0	1	0	0	1	1	0	0	1	1	0
	0 : No complementary tRNA
	1: At least one complementary tRNA
[truncated: 16 more columns]
